# Supplementary material for: Low Distribution of TIM-3+ Cytotoxic Tumor-Infiltrating Lymphocytes Predicts Poor Outcomes in Gastrointestinal Stromal Tumors
Source: Hindawi journal article supplement (doi:10.1155/2021/6647292), 2021-02-17

Supplementary Figure 1

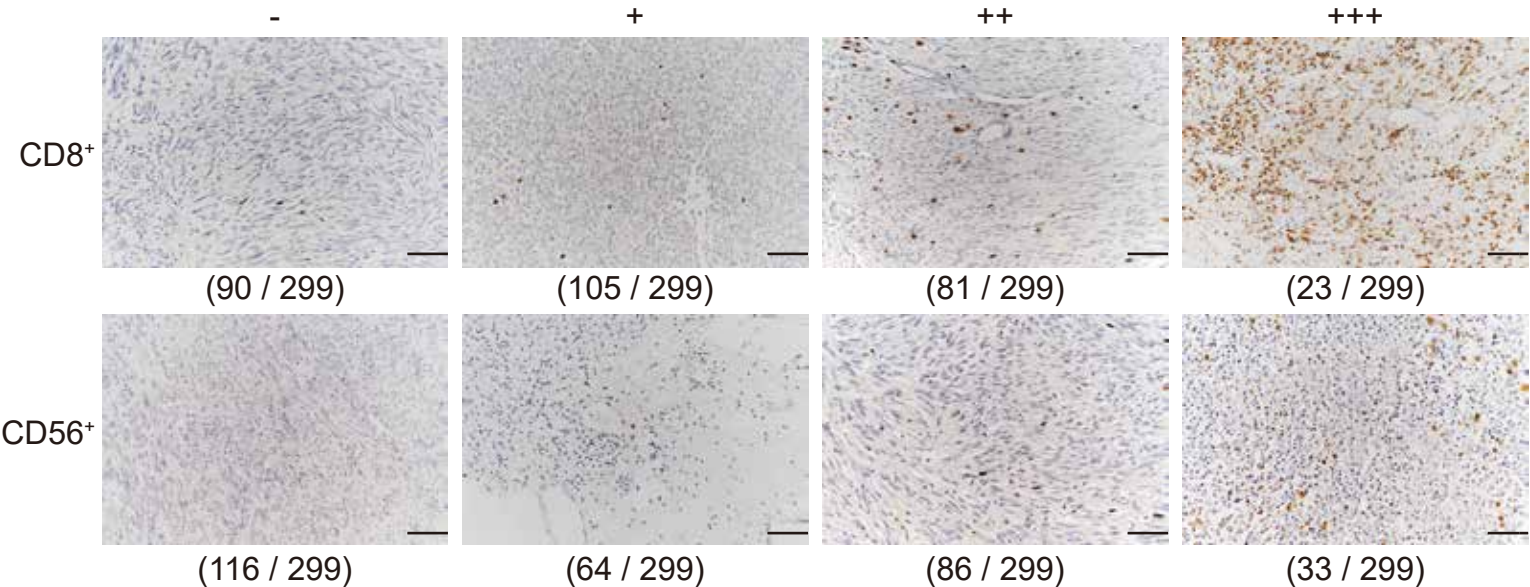

Supplement: f1 [file 6647292.f1.pdf]
